# Supplementary material
Source: PubMed Central journal article supplement (PMC6994129)
Supplement: jci-130-121127-s087.pdf [file jci-130-121127-s087.pdf]

Supplemental documents (supplemental tables 1-3)

**Table S1. Demographics and Pre-treatment Characteristics of HCT Recipients**

| Protocol | UPN               | HCT          | HLA-match | Time <sup>A</sup> | Age  | ExN <sup>B</sup> | CNS | LN <sup>C</sup> | ≥ 3 sites | # Rx <sup>D</sup> | Doses of Ritux <sup>E</sup> | Response to Ritux | Prior RT | Response to RT | Prior Chemo | Chemo, Specify          | Other EBV Therapy | Response to Other Therapy | Response to EBV-CTLs |
|----------|-------------------|--------------|-----------|-------------------|------|------------------|-----|-----------------|-----------|-------------------|-----------------------------|-------------------|----------|----------------|-------------|-------------------------|-------------------|---------------------------|----------------------|
| 95-024   | 5630              | CBU          | 5/6       | 34                | 8.0  | Y                | N   | A/B             | Y         | 2                 | 5                           | POD               | N        | n/a            | Y           | Methylpred<br>Cyclophos | N                 | n/a                       | POD                  |
| 95-024   | 5634              | PBSCT        | 9/10      | 68                | 17.4 | Y                | Y   | A/B             | Y         | 3                 | 1                           | PR ->POD          | N        | n/a            | Y           | ANHL0221                | tonsillectomy     | local control             | POD                  |
| 11-130   | 5627              | cBMT         | 8/10      | 14                | 19.0 | Y                | N   | A/B             | Y         | 2                 | 4                           | SD                | N        | n/a            | N           | n/a                     | tonsillectomy     | local control             | CR                   |
| 11-130   | 4234              | TCD<br>PBSCT | 10/10     | 37                | 65.5 | N                | N   | A/B             | Y         | 1                 | 4                           | PR                | N        | n/a            | N           | n/a                     | N                 | n/a                       | CR                   |
| 11-130   | 4835              | TCD<br>PBSCT | 9/10      | 40                | 52.0 | Y                | N   | A/B             | Y         | 2                 | 4                           | POD               | N        | n/a            | N           | n/a                     | tonsillectomy     | local control             | POD                  |
| 11-130   | 4513              | TCD<br>PBSCT | 10/10     | 32                | 63.4 | Y                | N   | N               | N         | 1                 | 4                           | PR                | N        | n/a            | N           | n/a                     | N                 | n/a                       | PR                   |
| 11-130   | 5605              | TCD<br>BMT   | 9/10      | 13                | 11.0 | N                | N   | A/B             | N         | 1                 | 5                           | SD                | N        | n/a            | N           | n/a                     | N                 | n/a                       | CR                   |
| 11-130   | 5613              | DUBCT        | 5/6; 4/6  | 71                | 68.4 | N                | N   | B               | N         | 2                 | 8                           | CR ->REL          | N        | n/a            | Y           | Brentuximab             | N                 | n/a                       | POD                  |
| 11-130   | 5601              | TCD<br>PBSCT | 10/10     | 54                | 74.1 | Y                | N   | A               | Y         | 1                 | 5                           | POD               | N        | n/a            | N           | n/a                     | N                 | n/a                       | POD                  |
| 11-130   | 5431              | TCD<br>PBSCT | 8/10      | 17                | 23.7 | N                | N   | A               | N         | 1                 | 4                           | PR                | N        | n/a            | N           | n/a                     | N                 | n/a                       | CR                   |
| 11-130   | 5625              | cBMT         | 8/10      | 39                | 28.4 | Y                | N   | A/B             | Y         | 1                 | 6                           | PR -> POD         | N        | n/a            | N           | n/a                     | N                 | n/a                       | POD                  |
| 11-130   | 5619              | TCD<br>PBSCT | 5/10      | 8                 | 19.7 | N                | N   | A/B             | N         | 1                 | 4                           | POD               | N        | n/a            | N           | n/a                     | N                 | n/a                       | CR                   |
| 95-024   | 5632              | CBU          | 4/6       | 11                | 11.4 | Y                | N   | A/B             | Y         | 2                 | 5                           | POD               | N        | n/a            | Y           | HU                      | N                 | n/a                       | CR                   |
| 95-024   | 5633              | PBSCT        | 10/10     | 37                | 63.1 | Y                | N   | A/B             | Y         | 1                 | 6                           | POD               | N        | n/a            | N           | n/a                     | N                 | n/a                       | CR                   |
| 11-130   | 5558              | cBMT         | 10/10     | 8                 | 28.2 | Y                | N   | A/B             | Y         | 1                 | 2                           | SD                | N        | n/a            | N           | n/a                     | N                 | n/a                       | CR                   |
| 11-130   | 5626              | cBMT         | 10/10     | 43                | 19.4 | Y                | N   | N               | Y         | 1                 | 5                           | POD               | N        | n/a            | N           | n/a                     | N                 | n/a                       | N/E                  |
| 95-024   | 5628 <sup>f</sup> | CBU          | 5/6       | 169               | 7.7  | Y                | N   | N               | N         | 2                 | >14                         | CR -> POD         | Y        | local control  | N           | n/a                     | N                 | n/a                       | POD                  |
| 95-024   | 3520 <sup>f</sup> | TCD<br>PBSCT | 10/10     | 6                 | 62.4 | Y                | N   | A/B             | Y         | 1                 | 1                           | N/A               | N        | n/a            | N           | n/a                     | N                 | n/a                       | CR                   |
| 11-130   | 5597              | DUBCT        | 4/6; 4/6  | 14                | 21.5 | Y                | N   | A/B             | Y         | 1                 | 2                           | POD               | N        | n/a            | N           | n/a                     | N                 | n/a                       | CR                   |
| 11-130   | 5592              | PBSCT        | 10/10     | 17                | 52.6 | N                | N   | A               | N         | 1                 | 3                           | POD               | N        | n/a            | N           | n/a                     | N                 | n/a                       | CR                   |

|        |                   |              |                 |     |      |   |   |     |   |   |   |           |   |     |   |         |                         |                  |     |
|--------|-------------------|--------------|-----------------|-----|------|---|---|-----|---|---|---|-----------|---|-----|---|---------|-------------------------|------------------|-----|
| 95-024 | 3886              | TCD<br>PBSCT | 10/10           | 7   | 36.0 | Y | N | A/B | Y | 1 | 5 | CR -> REL | N | n/a | N | n/a     | N                       | n/a              | CR  |
| 11-130 | 4286              | TCD<br>PBSCT | 9/10            | 9   | 20.4 | Y | N | A/B | Y | 1 | 3 | POD       | N | n/a | N | n/a     | N                       | n/a              | POD |
| 11-130 | 5602              | DUBCT        | 5/6; 4/6        | 141 | 59.2 | Y | N | N   | N | 3 | 4 | CR ->REL  | Y | PR  | Y | R-CHOP  | N                       | n/a              | CR  |
| 11-130 | 5616              | cBMT         | 10/10           | 41  | 17.7 | Y | Y | A/B | Y | 1 | 4 | SD        | N | n/a | N | n/a     | N                       | n/a              | CR  |
| 95-024 | 5631              | PBSCT        | 8/8             | 42  | 70.4 | Y | N | N   | N | 1 | 5 | POD       | N | n/a | N | n/a     | N                       | n/a              | CR  |
| 95-024 | 5629 <sup>f</sup> | CBU          | 4/6             | 104 | 10.0 | Y | Y | N   | N | 3 | 8 | PR        | Y | PR  | Y | HU      | N                       | n/a              | CR  |
| 11-130 | 5609              | DUBCT        | 4/6; 4/6        | 53  | 66.7 | Y | N | A/B | Y | 2 | 4 | POD       | N | n/a | Y | R-EPOCH | N                       | n/a              | POD |
| 11-130 | 5593              | TCD<br>PBSCT | 8/8<br>(9/10)   | 11  | 5.1  | N | N | A/B | N | 4 | 2 | POD       | Y | POD | N | n/a     | boost;<br>tonsillectomy | local<br>control | PR  |
| 11-130 | 5603              | cBMT         | 9/10            | 57  | 15.7 | Y | Y | N   | Y | 1 | 7 | SD        | N | n/a | N | n/a     | N                       | n/a              | PR  |
| 11-130 | 5091              | DUBCT<br>CBU | 5/6, 5/6<br>4/6 | 11  | 54.7 | Y | N | B   | Y | 1 | 3 | SD        | N | n/a | N | n/a     | N                       | n/a              | CR  |
| 11-130 | 5622              | CBU          | 3/6             | 24  | 16.7 | N | Y | N   | N | 1 | 4 | SD        | N | n/a | N | n/a     | N                       | n/a              | CR  |
| 95-024 | 3603 <sup>f</sup> | TCD<br>PBSCT | 7/10            | 43  | 5.6  | Y | N | B   | Y | 2 | 6 | POD       | N | n/a | N | n/a     | 1* EBV CTLs             | POD              | CR  |
| 11-130 | 4032              | cBMT         | 9/10            | 19  | 72.7 | Y | N | N   | N | 1 | 4 | POD       | N | n/a | N | n/a     | N                       | n/a              | POD |

- A. Time from proximate diagnosis of EBV-LPD to start of EBV-CTLs
- B. Extranodal involvement; Y=Yes, N=No
- C. Involvement of Lymph Nodes Above (A) or Below (B) the diaphragm
- D. Number of prior therapies
- E. Number of doses of Rituximab (some given with chemotherapy)
- F. Patient previously reported (17, 30)

**Table S2. Demographics and Pre-Treatment Characteristics of SOT Recipients**

| Protocol | UPN  | Age at SOT | Organ       | Prior Rejection <sup>A</sup> | Time <sup>B</sup> | ExN <sup>C</sup> | CNS | LN <sup>D</sup> | ≥ 3 sites | Prior RT | Prior CHEMO | Disease Status at Start of EBV-CTLs | Response to EBV-CTLs |
|----------|------|------------|-------------|------------------------------|-------------------|------------------|-----|-----------------|-----------|----------|-------------|-------------------------------------|----------------------|
| 11-130   | 5618 | 2.5        | HEART       | Y                            | 34                | Y                | Y   | a/b             | Y         | N        | Y           | Recurrent                           | POD                  |
| 95-024   | 5639 | 2.7        | SMALL BOWEL | Y                            | 221               | Y                | N   | a/b             | Y         | N        | Y           | Recurrent                           | SD                   |
| 11-130   | 5598 | 1.8        | RENAL       | Y                            | 448               | N                | Y   | N               | N         | N        | Y           | Residual                            | CR                   |
| 11-130   | 5624 | 1.7        | HEART       | Y                            | 99                | Y                | N   | a/b             | Y         | N        | Y           | Recurrent                           | POD                  |
| 95-024   | 5637 | 3.4        | RENAL       | N                            | 184               | Y                | N   | a/b             | Y         | Y        | Y           | Recurrent                           | POD                  |
| 11-130   | 5606 | 24.7       | RENAL       | N                            | 36                | N                | Y   | N               | N         | Y        | N           | Residual                            | PR                   |
| 11-130   | 5744 | 35.0       | LUNG        | Y                            | 142               | Y                | N   | a/b             | Y         | N        | Y           | Recurrent                           | POD                  |
| 11-130   | 5599 | 10.7       | LIVER       | Y                            | 160               | N                | Y   | N               | N         | Y        | Y           | Residual                            | PR                   |
| 11-130   | 5604 | 18.1       | RENAL       | N                            | 382               | Y                | N   | b               | N         | Y        | Y           | POD                                 | POD                  |
| 11-130   | 5620 | 75.2       | RENAL       | N                            | 83                | N                | Y   | N               | N         | N        | N           | POD                                 | CR                   |
| 95-024   | 5640 | 0.7        | HEART       | Y                            | 21                | Y                | N   | a/b             | Y         | N        | Y           | Recurrent                           | PR                   |
| 95-024   | 5638 | 42.2       | LIVER       | Y                            | 224               | N                | N   | a               | N         | N        | Y           | Recurrent                           | PR                   |
| 11-130   | 5595 | 18.0       | HEART/LIVER | Y                            | 232               | N                | Y   | N               | N         | Y        | Y           | POD                                 | PR                   |

- A. Episodes of prior solid organ rejection Yes (Y) or No (N)
- B. Time from proximate diagnosis of EBV-LPD to start of EBV-CTLs
- C. Extranodal involvement; Y=Yes, N=No
- D. Involvement of Lymph Nodes Above (A) or Below (B) the diaphragm

**Table S3. Histology, Clonality, Origin and Proliferative index of the Post-Transplant EBV+ Lymphomas**

| UPN  | Protocol | Transplant | Pathology                         | clonality   | Origin  | Proliferative Index |
|------|----------|------------|-----------------------------------|-------------|---------|---------------------|
| 3520 | 95-024   | HCT        | lymphoid hyperplasia              | unknown     | unknown | unknown             |
| 3603 | 95-024   | HCT        | monomorphic DLBCL                 | clonal      | host    | 80%                 |
| 3886 | 95-024   | HCT        | monomorphic DLBCL                 | unknown     | donor   | 60-70%              |
| 4032 | 11-130   | HCT        | monomorphic DLBCL                 | unknown     | unknown | 80-90%              |
| 4234 | 11-130   | HCT        | monomorphic DLBCL                 | unknown     | unknown | 90%                 |
| 4286 | 11-130   | HCT        | monomorphic DLBCL                 | not clonal  | donor   | 90%                 |
| 4513 | 11-130   | HCT        | monomorphic DLBCL                 | unknown     | unknown | 80%                 |
| 4835 | 11-130   | HCT        | monomorphic DLBCL                 | clonal      | donor   | 70%                 |
| 5431 | 11-130   | HCT        | mononucleosis like PTLD           | oligoclonal | unknown | 40%                 |
| 5592 | 11-130   | HCT        | monomorphic DLBCL                 | clonal      | donor   | > 90%               |
| 5593 | 11-130   | HCT        | monomorphic DLBCL w/plasmacytoid  | clonal      | unknown | 70-90%              |
| 5597 | 11-130   | HCT        | monomorphic DLBCL                 | not clonal  | host    | 90%                 |
| 5601 | 11-130   | HCT        | polymorphic                       | clonal      | unknown | 80%                 |
| 5602 | 11-130   | HCT        | monomorphic DLBCL                 | unknown     | unknown | unknown             |
| 5603 | 11-130   | HCT        | monomorphic DLBCL                 | unknown     | donor   | 70%                 |
| 5605 | 11-130   | HCT        | monomorphic DLBCL                 | clonal      | unknown | 90%                 |
| 5609 | 11-130   | HCT        | monomorphic DLBCL                 | clonal      | donor   | unknown             |
| 5613 | 11-130   | HCT        | Hodgkin Like                      | n/a         | unknown | >50%                |
| 5616 | 11-130   | HCT        | polymorphic DLBCL w/plasmacytoid  | not clonal  | unknown | 90%                 |
| 5622 | 11-130   | HCT        | monomorphic DLBCL                 | not clonal  | donor   | 90%                 |
| 5625 | 11-130   | HCT        | monomorphic DLBCL                 | clonal      | donor   | >90%                |
| 5626 | 11-130   | HCT        | monomorphic DLBCL                 | clonal      | unknown | unknown             |
| 5627 | 11-130   | HCT        | monomorphic DLBCL                 | clonal      | unknown | 60-70%              |
| 5628 | 95-024   | HCT        | monomorphic DLBCL                 | clonal      | donor   | >90%                |
| 5629 | 95-024   | HCT        | monomorphic DLBCL                 | clonal      | donor   | >90%                |
| 5630 | 95-024   | HCT        | monomorphic DLBCL                 | clonal      | donor   | 80%                 |
| 5631 | 95-024   | HCT        | monomorphic DLBCL                 | unknown     | unknown | unknown             |
| 5632 | 95-024   | HCT        | monomorphic DLBCL                 | clonal      | unknown | unknown             |
| 5633 | 95-024   | HCT        | polymorphic DLBCL w/ plasmacytoid | clonal      | unknown | unknown             |
| 5634 | 95-024   | HCT        | monomorphic DLBCL                 | clonal      | donor   | 70%                 |
| 5595 | 11-130   | SOT        | monomorphic DLBCL                 | not clonal  | host    | unknown             |
| 5598 | 11-130   | SOT        | polymorphic w/ Hodgkin-like       | n/a         | host    | 50-60%              |
| 5599 | 11-130   | SOT        | monomorphic DLBCL                 | unknown     | host    | unknown             |
| 5604 | 11-130   | SOT        | monomorphic DLBCL w/ plasmacytoid | unknown     | unknown | 80%                 |
| 5606 | 11-130   | SOT        | monomorphic DLBCL                 | unknown     | host    | 30-50%              |
| 5618 | 11-130   | SOT        | monomorphic DLBCL                 | not clonal  | unknown | > 50%               |
| 5620 | 11-130   | SOT        | monomorphic DLBCL                 | clonal      | host    | unknown             |
| 5624 | 11-130   | SOT        | monomorphic DLBCL                 | clonal      | unknown | 70%                 |
| 5637 | 95-024   | SOT        | polymorphic DLBCL                 | not clonal  | unknown | >90%                |
| 5638 | 95-024   | SOT        | polymorphic w/ plasmacytoid       | unknown     | unknown | unknown             |
| 5639 | 95-024   | SOT        | polymorphic DLBCL                 | clonal      | host    | 80% (MIB-1)         |
| 5640 | 95-024   | SOT        | polymorphic DLBCL                 | clonal      | host    | unknown             |
| 5744 | 11-130   | SOT        | monomorphic DLBCL                 | clonal      | unknown | 50-80%              |
